# Supplementary material for: The potential of artificial intelligence to improve patient safety: a scoping review
Source: PubMed Central journal article supplement (PMC7979747; doi:10.1038/s41746-021-00423-6), 2021-03-19
Supplement: 41746_2021_423_MOESM1_ESM.pdf [file 41746_2021_423_MOESM1_ESM.pdf]

## SUPPLEMENTARY INFORMATION

### Supplementary Note 1. MEDLINE (Ovid) search strategy (October 25, 2019)

1. exp Artificial Intelligence/ or ((Artificial or Comput\* or Machine) adj1 Intelligence).ti,ab.  
or ((Machine or Deep) adj1 Learning).ti,ab. or Neural Network\*.ti,ab. or Natural  
Language Processing\*.ti,ab. or Computer Vision\*.ti,ab.
2. exp Patient Safety/ or Patient Safet\*.ti,ab.
3. (exp Patients/ or exp Inpatients/ or exp Hospitals/) and (exp Safety Management/ or exp  
Risk Management/ or exp Safety/)
4. exp Cross Infection/ or exp Infection Control/ or ((Nosocomial or Hospital or Cross or  
Health Care Associated or Healthcare Associated or Iatrogen\*) adj1 Infection\*).ti,ab.
5. exp "Drug-Related Side Effects and Adverse Reactions"/ or (Adverse Drug Event\* or  
Adverse Drug Reaction\* or Drug Side Effect\* or Drug Toxicit\*).ti,ab.
6. exp Venous Thrombosis/ or exp Pulmonary Embolism/ or (DVT or Deep Vein Thrombos\*  
or Deep Venous Thrombos\*).ti,ab. or (Pulmonary Emboli\* or Pulmonary  
Thromboemboli\*).ti,ab.
7. exp \*Intraoperative Complications/ or exp \*Postoperative Complications/ or  
((Intraoperative or Peroperative or Postoperative or Surg\*) adj1 Complication\*).ti,ab. or  
Surgical injur\*.ti,ab.
8. exp Accidental Falls/ or ((Inpatient or Patient) adj3 Fall\*).ti,ab.
9. exp Pressure Ulcer/ or (Pressure ulcer\* or Pressure sore\* or Bedsore\* or Bed  
sore\*).ti,ab.

10. exp Clinical Deterioration/ or (Clinical Deterioration\* or Decompensation\*).ti,ab. or exp Sepsis/ or (Sepsis\* or Septicemia\* or Septic Shock\*).ti,ab. or exp Failure to Rescue, Health Care/ or Failure to rescue\*.ti,ab.
11. exp \*Diagnostic Errors/ or exp \*Delayed Diagnosis/ or ((Diagnos\* adj3 (error\* or delay\* or miss\*)) or Misdiagnos\*).ti,ab.
12. 2 or 3 or 4 or 5 or 6 or 7 or 8 or 9 or 10 or 11
13. 1 and 12
14. limit 13 to (English language and humans)

**Supplementary Table 1.** Inclusion and exclusion criteria for the scoping review

| Inclusion criteria                                                                                                                                                                                                                                                                                                                                                                                                  | Exclusion criteria                                                                                                                                                          |
|---------------------------------------------------------------------------------------------------------------------------------------------------------------------------------------------------------------------------------------------------------------------------------------------------------------------------------------------------------------------------------------------------------------------|-----------------------------------------------------------------------------------------------------------------------------------------------------------------------------|
| Articles describing the application of AI for prediction, prevention, or early detection of events in eight harm domains: <ul style="list-style-type: none"> <li>- Healthcare-associated infections</li> <li>- Adverse drug events</li> <li>- Venous thromboembolism</li> <li>- Surgical complications</li> <li>- Falls</li> <li>- Pressure ulcers</li> <li>- Decompensation</li> <li>- Diagnostic error</li> </ul> | Articles focused on detection in general, rather than timely (i.e., early) detection (e.g., AI solutions to automate analysis of diagnostic imaging or radiologic reports)  |
|                                                                                                                                                                                                                                                                                                                                                                                                                     | Articles focused on the application of AI to measure the frequency of harm events (e.g., post-marketing surveillance of drugs, analysis of adverse event reporting systems) |
| Articles focused on inpatient, outpatient, community, and home settings                                                                                                                                                                                                                                                                                                                                             | Articles describing applications in robotics                                                                                                                                |
| All article types (e.g., original research, reviews, and commentaries)                                                                                                                                                                                                                                                                                                                                              | Articles not published in the English language                                                                                                                              |

AI Artificial intelligence.

**Supplementary Table 2.** Data abstraction for studies included in the scoping review

| Title of article                                                                                                                                                                                        | First author name    | Year | PMID or citation | Harm domains                                                 |
|---------------------------------------------------------------------------------------------------------------------------------------------------------------------------------------------------------|----------------------|------|------------------|--------------------------------------------------------------|
| Evaluation of complications of kidney transplantation using artificial neural networks.                                                                                                                 | Abdolmaleki, P.      | 1997 | 9342099          | Surgical complications                                       |
| Big data cohort extraction for personalized statin treatment and machine learning.                                                                                                                      | Adam, T. J.          | 2019 | 30848466         | Adverse drug events                                          |
| Creation of an effective colorectal anastomotic leak early detection tool using an artificial neural network.                                                                                           | Adams, K.            | 2014 | 24337715         | Surgical complications                                       |
| High-accuracy detection of early Parkinson's Disease using multiple characteristics of finger movement while typing.                                                                                    | Adams, W. R.         | 2017 | 29190695         | Diagnostic error                                             |
| Artificial-intelligence-based hospital-acquired infection control.                                                                                                                                      | Adlassnig, K. P.     | 2009 | 19745475         | Healthcare-associated infections                             |
| Healthcare-associated infection surveillance and bedside alerts.                                                                                                                                        | Adlassnig, K. P.     | 2014 | 24825687         | Healthcare-associated infections                             |
| A fall prediction methodology for elderly based on a depth camera.                                                                                                                                      | Alazrai, R.          | 2015 | 26737412         | Falls                                                        |
| Predicting pressure injury in critical care patients: a machine-learning model.                                                                                                                         | Alderden, J.         | 2018 | 30385537         | Decompensation                                               |
| Passive in-home health and wellness monitoring: overview, value and examples.                                                                                                                           | Alwan, M.            | 2009 | 19964350         | Falls                                                        |
| Impact of a Web-based diagnosis reminder system on errors of diagnosis.                                                                                                                                 | Amy, L. R.           | 2006 | 17238463         | Diagnostic error                                             |
| Outcomes and complications after endovascular treatment of brain arteriovenous malformations: a prognostication attempt using artificial intelligence.                                                  | Asadi, H.            | 2016 | 27693769         | Surgical complications                                       |
| Feature selection for the accurate prediction of septic and cardiogenic shock ICU mortality in the acute phase.                                                                                         | Aushev, A.           | 2018 | 30457997         | Decompensation                                               |
| The use of privacy-protected computer vision to measure the quality of healthcare worker hand hygiene.                                                                                                  | Awwad, S.            | 2019 | 29767747         | Healthcare-associated infections                             |
| The effect of window size and lead time on pre-impact fall detection accuracy using support vector machine analysis of waist mounted inertial sensor data.                                              | Aziz, O.             | 2014 | 25569889         | Falls                                                        |
| A comparison of accuracy of fall detection algorithms (threshold-based vs. machine learning) using waist-mounted tri-axial accelerometer signals from a comprehensive set of falls and non-fall trials. | Aziz, O.             | 2017 | 27106749         | Falls                                                        |
| A classification framework for exploiting sparse multi-variate temporal features with application to adverse drug event detection in medical records.                                                   | Bagattini, F.        | 2019 | 30630486         | Adverse drug events                                          |
| Development and performance of the pulmonary embolism result forecast model (PERFORM) for computed tomography clinical decision support.                                                                | Banerjee, I.         | 2019 | 31390040         | Venous thromboembolism                                       |
| Classifying bed inclination using pressure images.                                                                                                                                                      | Baran, P.            | 2014 | 25571032         | Pressure ulcers                                              |
| A comparative analysis of predictive models of morbidity in intensive care unit after cardiac surgery - part I: model planning.                                                                         | Barbini, E.          | 2007 | 18034872         | Decompensation; Surgical complications                       |
| Position recognition to support bedsores prevention.                                                                                                                                                    | Barsocchi, P.        | 2013 | 23014763         | Pressure ulcers                                              |
| Enhanced neonatal surgical site infection prediction model utilizing statistically and clinically significant variables in combination with a machine learning algorithm.                               | Bartz-Kurycki, M. A. | 2018 | 30078669         | Healthcare-associated infections; Surgical complications     |
| Postoperative vomiting in pediatric oncologic patients: prediction by a fuzzy logic model.                                                                                                              | Bassanezi, B. S. B.  | 2013 | 22998327         | Surgical complications                                       |
| Integrated use of bedside lung ultrasound and echocardiography in acute respiratory failure: a prospective observational study in ICU.                                                                  | Bataille, B.         | 2014 | 25144893         | Diagnostic error                                             |
| Detecting adverse events using information technology.                                                                                                                                                  | Bates, D. W.         | 2003 | 12595401         | Adverse drug events; Falls; Healthcare-associated infections |
| New approach to risk determination: development of risk profile for new falls among community-dwelling older people by use of a Genetic Algorithm Neural Network (GANN).                                | Bath, P. A.          | 2000 | 10719768         | Falls                                                        |
| A neural network aid for the early diagnosis of cardiac ischemia in patients presenting to the emergency department with chest pain.                                                                    | Baxt, W. G.          | 2002 | 12447333         | Diagnostic error                                             |
| Falls risk prediction for older inpatients in acute care medical wards: is there an interest to combine an early nurse assessment and the artificial neural network analysis?.                          | Beauchet, O.         | 2018 | 29300432         | Falls                                                        |

|                                                                                                                                                                                      |                      |      |          |                                                          |
|--------------------------------------------------------------------------------------------------------------------------------------------------------------------------------------|----------------------|------|----------|----------------------------------------------------------|
| Assessing patient risk of central line-associated bacteremia via machine learning.                                                                                                   | Beeler, C.           | 2018 | 29661634 | Healthcare-associated infections                         |
| A signal processing approach for detection of hemodynamic instability before decompensation.                                                                                         | Belle, A.            | 2016 | 26871715 | Decompensation                                           |
| AI tackles hospital infections: machine learning is helping clinicians.                                                                                                              | Berglund, J.         | 2018 | 30452339 | Healthcare-associated infections                         |
| Three different cases of exploiting decision support services for adverse drug event prevention.                                                                                     | Bernonille, S.       | 2011 | 21685623 | Adverse drug events                                      |
| Surgical risk is not linear: derivation and validation of a novel, user-friendly, and machine-learning-based predictive optimal trees in emergency surgery risk (POTTER) calculator. | Bertsimas, D.        | 2018 | 30124479 | Healthcare-associated infections; Surgical complications |
| Predicting common maternal postpartum complications: leveraging health administrative data and machine learning.                                                                     | Betts, K. S.         | 2019 | 30628159 | Surgical complications                                   |
| The potential for intelligent decision support systems to improve the quality and consistency of medication reviews.                                                                 | Bindoff, I.          | 2012 | 22175237 | Adverse drug events                                      |
| Rapid, accurate, and on-site detection of <i>C. difficile</i> in stool samples.                                                                                                      | Bomers, M. K.        | 2015 | 25823766 | Diagnostic error                                         |
| Neural network processing can provide means to catch errors that slip through human screening of pap smears.                                                                         | Boon, M. E.          | 1993 | 8261846  | Diagnostic error                                         |
| Advanced technologies to curb healthcare-associated infections.                                                                                                                      | Boscart, V. M.       | 2009 | 19593077 | Healthcare-associated infections                         |
| Who is a high-risk surgical patient?                                                                                                                                                 | Bose, S.             | 2018 | 30308542 | Surgical complications                                   |
| An automated detection system of drug-drug interactions from electronic patient records using big data analytics.                                                                    | Bouzille, G.         | 2019 | 31437882 | Adverse drug events                                      |
| Continuous monitoring in an inpatient medical-surgical unit: a controlled clinical trial.                                                                                            | Brown, H.            | 2014 | 24342543 | Decompensation                                           |
| The HELP system and its application to infection control.                                                                                                                            | Burke, J. P.         | 1991 | 1679811  | Healthcare-associated infections                         |
| Screening swabs surpass traditional risk factors as predictors of MRSA bacteremia.                                                                                                   | Butler-Laporte, G.   | 2018 | 29890954 | Healthcare-associated infections                         |
| Full-text automated detection of surgical site infections secondary to neurosurgery in Rennes, France.                                                                               | Campillo-Gimenez, B. | 2013 | 23920620 | Healthcare-associated infections; Surgical complications |
| A comparative analysis of predictive models of morbidity in intensive care unit after cardiac surgery - part II: an illustrative example.                                            | Cevenini, G.         | 2007 | 18034873 | Decompensation; Surgical complications                   |
| Predicting hospital-acquired infections by scoring system with simple parameters.                                                                                                    | Chang, Y. J.         | 2011 | 21887234 | Healthcare-associated infections                         |
| Detecting evidence of intra-abdominal surgical site infections from radiology reports using natural language processing.                                                             | Chapman, A. B.       | 2017 | 29854116 | Surgical complications                                   |
| Detecting adverse drug events with rapidly trained classification models.                                                                                                            | Chapman, A. B.       | 2019 | 30649737 | Adverse drug events                                      |
| Prediction of feature genes in trauma patients with the TNF rs1800629 A allele using support vector machine.                                                                         | Chen, G.             | 2015 | 26117649 | Decompensation                                           |
| Artificial neural network: a method for prediction of surgery-related pressure injury in cardiovascular surgical patients.                                                           | Chen, H. L.          | 2018 | 29189496 | Surgical complications                                   |
| Use of an artificial neural network to predict risk factors of nosocomial infection in lung cancer patients.                                                                         | Chen, J.             | 2014 | 25041000 | Healthcare-associated infections                         |
| Use of an artificial neural network to construct a model of predicting deep fungal infection in lung cancer patients.                                                                | Chen, J.             | 2015 | 26163648 | Healthcare-associated infections                         |
| The application of artificial neural networks and decision tree model in predicting post-operative complication for gastric cancer patients.                                         | Chien, C. W.         | 2008 | 18705347 | Surgical complications                                   |
| Heart rate variability based machine learning models for risk prediction of suspected sepsis patients in the emergency department.                                                   | Chiew, C. J.         | 2019 | 30732136 | Decompensation                                           |
| Responses of staff nurses to an emr-based clinical decision support service for predicting inpatient fall risk.                                                                      | Cho, I.              | 2019 | 31438275 | Falls                                                    |
| Analytical performance of Envisia: a genomic classifier for usual interstitial pneumonia.                                                                                            | Choi, Y.             | 2017 | 29149880 | Diagnostic error                                         |
| Multicenter comparison of machine learning methods and conventional regression for predicting clinical deterioration on the wards.                                                   | Churpek, M. M.       | 2016 | 26771782 | Decompensation                                           |
| Artificial neural networks as prediction tools in the critically ill.                                                                                                                | Clermont, G.         | 2005 | 15774070 | Decompensation                                           |
| Sepsis reconsidered: Identifying novel metrics for behavioral landscape characterization with a high-performance computing implementation of an agent-based model.                   | Cockrell, C.         | 2017 | 28728997 | Decompensation                                           |
| Use of advanced machine-learning techniques for noninvasive monitoring of hemorrhage.                                                                                                | Convertino, V. A.    | 2011 | 21795890 | Decompensation                                           |

|                                                                                                                                                                                                       |                         |      |          |                                          |
|-------------------------------------------------------------------------------------------------------------------------------------------------------------------------------------------------------|-------------------------|------|----------|------------------------------------------|
| Development and validation of machine learning models to identify high-risk surgical patients using automatically curated electronic health record data (Pythia): A retrospective, single-site study. | Corey, K. M.            | 2018 | 30481172 | Decompensation; Surgical complications   |
| Semantic processing to identify adverse drug event information from black box warnings.                                                                                                               | Culbertson, A.          | 2014 | 25954348 | Adverse drug events                      |
| MRI features predictive of negative surgical margins in patients with HER2 overexpressing breast cancer undergoing breast conservation.                                                               | Dashevsky, B. Z.        | 2018 | 29321645 | Diagnostic error                         |
| Assessing the clinical uses of fuzzy detection results in the automated detection of CVC-related infections: a preliminary report.                                                                    | de Bruin, J. S.         | 2012 | 22874257 | Healthcare-associated infections         |
| Detecting borderline infection in an automated monitoring system for healthcare-associated infection using fuzzy logic.                                                                               | de Bruin, J. S.         | 2016 | 27156053 | Healthcare-associated infections         |
| Decision support system for triage management: A hybrid approach using rule-based reasoning and fuzzy logic.                                                                                          | Dehghani, S.            | 2018 | 29673601 | Diagnostic error                         |
| Design, implementation and evaluation of a clinical decision support system to prevent adverse drug events.                                                                                           | Del Fiol, G.            | 2000 | 11187651 | Adverse drug events                      |
| Comparison of two knowledge bases on the detection of drug-drug interactions.                                                                                                                         | Del, F.                 | 2000 | 11079867 | Adverse drug events                      |
| Towards precision medicine: accurate predictive modeling of infectious complications in combat casualties.                                                                                            | Dente, C. J.            | 2017 | 28538622 | Healthcare-associated infections         |
| A decision model to predict the risk of the first fall onset.                                                                                                                                         | Deschamps, T.           | 2016 | 27114199 | Falls                                    |
| Predicting adverse drug reactions through interpretable deep learning framework.                                                                                                                      | Dey, S.                 | 2018 | 30591036 | Adverse drug events                      |
| Artificial intelligence in clinical and genomic diagnostics.                                                                                                                                          | Dias, R.                | 2019 | 31744524 | Diagnostic error                         |
| ADESSA: a real-time decision support service for delivery of semantically coded adverse drug event data.                                                                                              | Duke, J. D.             | 2010 | 21346964 | Adverse drug events                      |
| Predictive modeling for blood transfusion after adult spinal deformity surgery: a tree-based machine learning approach.                                                                               | Durand, W. M.           | 2018 | 29215501 | Surgical complications                   |
| Learning a severity score for sepsis: a novel approach based on clinical comparisons.                                                                                                                 | Dyagilev, K.            | 2015 | 26958288 | Decompensation                           |
| Reduction of false arrhythmia alarms using signal selection and machine learning.                                                                                                                     | Eerikainen, L. M.       | 2016 | 27454128 | Decompensation                           |
| Designing a social and assistive robot for seniors.                                                                                                                                                   | Eftring, H.             | 2016 | 27220732 | Falls                                    |
| Predicting active pulmonary tuberculosis using an artificial neural network.                                                                                                                          | El-Solh, A. A.          | 1999 | 10531161 | Healthcare-associated infections         |
| Predicting the presence of acute pulmonary embolism: a comparative analysis of the artificial neural network, logistic regression, and threshold models.                                              | Eng, J.                 | 2002 | 12239027 | Venous thromboembolism                   |
| Neural networks as a prognostic tool of surgical risk in lung resections.                                                                                                                             | Esteva, H.              | 2002 | 12022553 | Surgical complications                   |
| Role of ventilation scintigraphy in diagnosis of acute pulmonary embolism: an evaluation using artificial neural networks.                                                                            | Evander, E.             | 2003 | 12748832 | Diagnostic error; Venous thromboembolism |
| Enhancing the fever workup utilizing a multi-technique modeling approach to diagnose infections more accurately.                                                                                      | Fadlalla, A. M. A.      | 2012 | 20666579 | Healthcare-associated infections         |
| Predicting risk for portal vein thrombosis in acute pancreatitis patients: A comparison of radial basis function artificial neural network and logistic regression models.                            | Fei, Y.                 | 2017 | 28246056 | Venous thromboembolism                   |
| Artificial neural networks predict the incidence of portosplenomesenteric venous thrombosis in patients with acute pancreatitis.                                                                      | Fei, Y.                 | 2017 | 27960048 | Venous thromboembolism                   |
| Risk prediction for portal vein thrombosis in acute pancreatitis using radial basis function.                                                                                                         | Fei, Y.                 | 2018 | 28943487 | Venous thromboembolism                   |
| Letter to the editor: predicting central line-associated bloodstream infections and mortality using supervised machine learning.                                                                      | Ferdoash, A.            | 2018 | 29778397 | Healthcare-associated infections         |
| Lateral inhibition in accumulative computation and fuzzy sets for human fall pattern recognition in colour and infrared imagery.                                                                      | Fernandez-Caballero, A. | 2013 | 24294142 | Falls                                    |
| Risk assessment for venous thromboembolism in chemotherapy-treated ambulatory cancer patients.                                                                                                        | Ferroni, P.             | 2017 | 27491558 | Venous thromboembolism                   |
| Predicting asthma exacerbations using artificial intelligence.                                                                                                                                        | Finkelstein, J.         | 2013 | 23823374 | Decompensation                           |
| Summarizing drug information in Medline citations.                                                                                                                                                    | Fizman, M.              | 2006 | 17238342 | Adverse drug events                      |
| Predicting survival of patients with sepsis by use of regression and neural network models.                                                                                                           | Flanagan, J. R.         | 1996 | 10156949 | Decompensation                           |
| Deep-learning model for predicting 30-day postoperative mortality.                                                                                                                                    | Fritz, B. A.            | 2019 | 31558311 | Surgical complications                   |
| Development of intelligent model to determine favorable wheelchair tilt and recline angles for people with spinal cord injury.                                                                        | Fu, J.                  | 2011 | 22254738 | Pressure ulcers                          |
| Towards an intelligent system for clinical guidance on wheelchair tilt and recline usage.                                                                                                             | Fu, J.                  | 2012 | 23366964 | Pressure ulcers                          |
| Development of intelligent model for personalized guidance on wheelchair tilt and recline usage for people with spinal cord injury: methodology and preliminary report.                               | Fu, J.                  | 2014 | 25333817 | Pressure ulcers                          |

|                                                                                                                                                                  |                     |      |          |                                                                                                |
|------------------------------------------------------------------------------------------------------------------------------------------------------------------|---------------------|------|----------|------------------------------------------------------------------------------------------------|
| Towards the consideration of diagnostic delay in model-based clinical decision support.                                                                          | Gaebel, J.          | 2017 | 29295404 | Diagnostic error                                                                               |
| The use of natural language processing on pediatric diagnostic radiology reports in the electronic health record to identify deep venous thrombosis in children. | Galvez, J. A.       | 2017 | 28815363 | Venous thromboembolism                                                                         |
| Visual search in breast imaging.                                                                                                                                 | Gandomkar, Z.       | 2019 | 31287719 | Diagnostic error                                                                               |
| A concept for graph-based temporal similarity of patient data.                                                                                                   | Ganzinger, M.       | 2019 | 31437901 | Decompensation                                                                                 |
| Model-based and model-free machine learning techniques for diagnostic prediction and classification of clinical outcomes in Parkinson's Disease.                 | Gao, C.             | 2018 | 29740058 | Falls                                                                                          |
| Automatic detection of surgical haemorrhage using computer vision.                                                                                               | García-Martínez, A. | 2017 | 28764873 | Surgical complications                                                                         |
| Feasibility of a real-time hand hygiene notification machine learning system in outpatient clinics.                                                              | Geilleit, R.        | 2018 | 29649558 | Healthcare-associated infections                                                               |
| Text mining electronic health records to identify hospital adverse events.                                                                                       | Gerdes, L. U.       | 2013 | 23920919 | Falls; Healthcare-associated infections; Pressure ulcers; Surgical complications               |
| Patient-specific early classification of multivariate observations.                                                                                              | Ghalwash, M. F.     | 2015 | 26336666 | Decompensation; Diagnostic error                                                               |
| Design and evaluation of a smart medication recommendation system for the electronic prescription.                                                               | Ghasemi, S. H.      | 2019 | 31118328 | Adverse drug events                                                                            |
| Septic shock prediction for ICU patients via coupled HMM walking on sequential contrast patterns.                                                                | Ghosh, S.           | 2017 | 28011233 | Decompensation                                                                                 |
| Assessment of fall-risk by means of a neural network based on parameters assessed by a wearable device during posturography.                                     | Giansanti, D.       | 2008 | 17560825 | Falls                                                                                          |
| Cervical false negative cases detected by neural network-based technology. Critical review of cytologic errors.                                                  | Giovagnoli, M. R.   | 2002 | 12462090 | Diagnostic error                                                                               |
| Cranial reconstruction after decompressive craniectomy: prediction of complications using fuzzy logic.                                                           | Godil, S. S.        | 2011 | 21772193 | Surgical complications                                                                         |
| Automated detection of harm in healthcare with information technology: a systematic review.                                                                      | Govindan, M.        | 2010 | 20671081 | Adverse drug events; Healthcare-associated infections; Pressure ulcers; Surgical complications |
| Prediction of postoperative opioid analgesia using clinical-experimental parameters and electroencephalography.                                                  | Gram, M.            | 2017 | 27470494 | Surgical complications                                                                         |
| Ontological approach for safe and effective polypharmacy prescription.                                                                                           | Grando, A.          | 2012 | 23304299 | Adverse drug events                                                                            |
| A multi-layer monitoring system for clinical management of congestive heart failure.                                                                             | Guidi, G.           | 2015 | 26391638 | Decompensation                                                                                 |
| From vital signs to clinical outcomes for patients with sepsis: a machine learning basis for a clinical decision support system.                                 | Gultepe, E.         | 2014 | 23959843 | Decompensation                                                                                 |
| Use of computerized surveillance to detect nosocomial pneumonia in neonatal intensive care unit patients.                                                        | Haas, J. P.         | 2005 | 16216656 | Healthcare-associated infections                                                               |
| Predicting ventriculoperitoneal shunt infection in children with hydrocephalus using artificial neural network.                                                  | Habibi, Z.          | 2016 | 27638720 | Surgical complications                                                                         |
| Toward a two-tier clinical warning system for hospitalized patients.                                                                                             | Hackmann, G.        | 2011 | 22195105 | Decompensation                                                                                 |
| A model for detecting balance impairment and estimating falls risk in the elderly.                                                                               | Hahn, M. E.         | 2005 | 16078620 | Falls                                                                                          |
| Robust breast cancer prediction system based on rough set theory at National Cancer Institute of Egypt.                                                          | Hamouda, S. K. M.   | 2018 | 29157458 | Diagnostic error                                                                               |
| Review of a large clinical series: Predicting death for patients with abdominal septic shock.                                                                    | Hanisch, E.         | 2011 | 21262751 | Decompensation                                                                                 |
| Cardiologist-level arrhythmia detection and classification in ambulatory electrocardiograms using a deep neural network.                                         | Hannun, A. Y.       | 2019 | 30617320 | Decompensation                                                                                 |

|                                                                                                                                             |                  |      |                                                                                                                                                                                  |                                          |
|---------------------------------------------------------------------------------------------------------------------------------------------|------------------|------|----------------------------------------------------------------------------------------------------------------------------------------------------------------------------------|------------------------------------------|
| Towards vision-based smart hospitals: a system for tracking and monitoring hand hygiene compliance.                                         | Haque, A.        | 2017 | Haque, A. et al. Towards vision-based smart hospitals: a system for tracking and monitoring hand hygiene compliance. <i>Mach. Learn. Healthc. Conf.</i> <b>68</b> , 1-13 (2017). | Healthcare-associated infections         |
| Artificial intelligence in surgery: promises and perils.                                                                                    | Hashimoto, D. A. | 2018 | 29389679                                                                                                                                                                         | Surgical complications                   |
| Computer vision analysis of intraoperative video: Automated recognition of operative steps in laparoscopic sleeve.                          | Hashimoto, D. A. | 2019 | 31274652                                                                                                                                                                         | Surgical complications                   |
| Multivariate computational analysis of biosensor's data for improved CD64 quantification for sepsis diagnosis.                              | Hassan, U.       | 2018 | 29564463                                                                                                                                                                         | Decompensation; Diagnostic error         |
| Extracting drug-drug interaction from the biomedical literature using a stacked generalization-based approach.                              | He, L.           | 2013 | 23785452                                                                                                                                                                         | Adverse drug events                      |
| Neural networks for prognostication of patients with heart failure.                                                                         | Hearn, J.        | 2018 | 30354561                                                                                                                                                                         | Decompensation                           |
| Artificial neural networks for recognition of electrocardiographic lead reversal.                                                           | Heden, B.        | 1995 | 7733003                                                                                                                                                                          | Diagnostic error                         |
| In-bed posture classification using deep autoencoders.                                                                                      | Heydarzadeh, M.  | 2016 | 28269123                                                                                                                                                                         | Pressure ulcers                          |
| A machine learning approach to predict early outcomes after pituitary adenoma surgery.                                                      | Hollon, T. C.    | 2018 | 30453460                                                                                                                                                                         | Surgical complications                   |
| Diagnostic outcomes of esophageal cancer by artificial intelligence using convolutional neural networks.                                    | Horie, Y.        | 2019 | 30120958                                                                                                                                                                         | Diagnostic error                         |
| Creating an automated trigger for sepsis clinical decision support at emergency department triage using machine learning.                   | Horng, S.        | 2017 | 28384212                                                                                                                                                                         | Decompensation                           |
| Formulation of a model for automating infection surveillance: algorithmic detection of central-line associated bloodstream infection.       | Hota, B.         | 2010 | 20064800                                                                                                                                                                         | Healthcare-associated infections         |
| TADAA: towards automated detection of anaesthetic activity.                                                                                 | Houliston, B. R. | 2011 | 21860884                                                                                                                                                                         | Surgical complications                   |
| Wearable-sensor-based classification models of faller status in older adults.                                                               | Howcroft, J.     | 2016 | 27054878                                                                                                                                                                         | Falls                                    |
| Prospective fall-risk prediction models for older adults based on wearable sensors.                                                         | Howcroft, J.     | 2017 | 28358689                                                                                                                                                                         | Falls                                    |
| Analysis and comparison of sleeping posture classification methods using pressure sensitive bed system.                                     | Hsia, C. C.      | 2009 | 19965072                                                                                                                                                                         | Pressure ulcers                          |
| Body posture recognition and turning recording system for the care of bed bound patients.                                                   | Hsiao, R. S.     | 2015 | 26444814                                                                                                                                                                         | Pressure ulcers                          |
| Sleeping posture recognition using fuzzy c-means algorithm.                                                                                 | Hsiao, R. S.     | 2018 | 30396347                                                                                                                                                                         | Pressure ulcers                          |
| Intelligent postoperative morbidity prediction of heart disease using artificial intelligence techniques.                                   | Hsieh, N. C.     | 2012 | 21184153                                                                                                                                                                         | Surgical complications                   |
| Prediction of clinical deterioration in hospitalized adult patients with hematologic malignancies using a neural network model.             | Hu, S. B.        | 2016 | 27532679                                                                                                                                                                         | Decompensation                           |
| Predicting warfarin dosage from clinical data: a supervised learning approach.                                                              | Hu, Y. H.        | 2012 | 22537823                                                                                                                                                                         | Adverse drug events                      |
| Decision tree-based learning to predict patient controlled analgesia consumption and readjustment.                                          | Hu, Y. J.        | 2012 | 23148492                                                                                                                                                                         | Adverse drug events                      |
| Post-operative bleeding risk stratification in cardiac pulmonary bypass patients using artificial neural network.                           | Huang, R. S. P.  | 2015 | 25887872                                                                                                                                                                         | Surgical complications                   |
| Application of artificial neural networks in renal transplantation: classification of nephrotoxicity and acute cellular rejection episodes. | Hummel, A. D.    | 2010 | 20304167                                                                                                                                                                         | Diagnostic error; Surgical complications |
| Artificial intelligence may help in predicting the need for additional surgery after endoscopic resection of T1 colorectal cancer.          | Ichimasa, K.     | 2018 | 29272905                                                                                                                                                                         | Diagnostic error                         |
| Challenges, issues and trends in fall detection systems.                                                                                    | Igual, R.        | 2013 | 23829390                                                                                                                                                                         | Falls                                    |
| Prediction of sepsis patients using machine learning approach: a meta-analysis.                                                             | Islam, M. M.     | 2019 | 30712598                                                                                                                                                                         | Decompensation                           |
| Comparison between logistic regression and neural networks to predict death in patients with suspected sepsis in the emergency room.        | Jaimes, F.       | 2005 | 15774048                                                                                                                                                                         | Decompensation                           |
| Computer-assisted diagnosis system for breast cancer in computed tomography laser mammography (CTLM).                                       | Jalalian, A.     | 2017 | 28429195                                                                                                                                                                         | Diagnostic error                         |
| Advancing in-hospital clinical deterioration prediction models.                                                                             | Jeffery, A. D.   | 2018 | 30173171                                                                                                                                                                         | Decompensation                           |
| Challenges in using the Arden Syntax for computer-based nosocomial infection surveillance.                                                  | Jenders, RA.     | 2001 | 11825197                                                                                                                                                                         | Healthcare-associated infections         |

|                                                                                                                                                            |                  |      |                                                                                                                                                                                        |                                                |
|------------------------------------------------------------------------------------------------------------------------------------------------------------|------------------|------|----------------------------------------------------------------------------------------------------------------------------------------------------------------------------------------|------------------------------------------------|
| Are mortality and acute morbidity in patients presenting with nonspecific complaints predictable using routine variables?.                                 | Jenny, M. A.     | 2015 | 26375290                                                                                                                                                                               | Diagnostic error                               |
| Heart rate variability analysis during central hypovolemia using wavelet transformation.                                                                   | Ji, S. Y.        | 2013 | 23371800                                                                                                                                                                               | Decompensation                                 |
| Fall down detection under smart home system.                                                                                                               | Juang, L. H.     | 2015 | 26276014                                                                                                                                                                               | Falls                                          |
| Identifying patients experiencing opioid-induced respiratory depression during recovery from anesthesia: the application of electronic monitoring devices. | Jungquist, C. R. | 2019 | 31050151                                                                                                                                                                               | Adverse drug events;<br>Surgical complications |
| Falling in the elderly: Do statistical models matter for performance criteria of fall prediction? Results from two large population-based studies.         | Kabeshova, A.    | 2016 | 26686927                                                                                                                                                                               | Falls                                          |
| Learning representations for the early detection of sepsis with deep neural networks.                                                                      | Kam, H. J.       | 2017 | 28843829                                                                                                                                                                               | Decompensation                                 |
| applying artificial intelligence to identify physiomarkers predicting severe sepsis in the PICU.                                                           | Kamaleswaran, R. | 2018 | 30052552                                                                                                                                                                               | Decompensation                                 |
| Automated identification of innocent still's murmur in children.                                                                                           | Kang, S.         | 2017 | 27576242                                                                                                                                                                               | Diagnostic error                               |
| Prediction of valve-related complications for artificial heart valves using adaptive neural networks: a preliminary study.                                 | Katz, AS.        | 1993 | 8269158                                                                                                                                                                                | Surgical complications                         |
| Prognostics of surgical site infections using dynamic health data.                                                                                         | Ke, C.           | 2017 | 27825798                                                                                                                                                                               | Surgical complications                         |
| Supervised machine-learning predictive analytics for prediction of postinduction hypotension.                                                              | Kendale, S.      | 2018 | 30074930                                                                                                                                                                               | Surgical complications                         |
| Review of fall detection techniques: a data availability perspective.                                                                                      | Khan, S. S.      | 2017 | 27889391                                                                                                                                                                               | Falls                                          |
| Computerized surveillance for adverse drug events in a pediatric hospital.                                                                                 | Kilbridge, P. M. | 2008 | 18998917                                                                                                                                                                               | Adverse drug events                            |
| Computerized surveillance for adverse drug events in a pediatric hospital.                                                                                 | Kilbridge, P. M. | 2009 | 19567791                                                                                                                                                                               | Adverse drug events                            |
| Predicting surgical complications in patients undergoing elective adult spinal deformity procedures using machine learning.                                | Kim, J. S.       | 2018 | 30348356                                                                                                                                                                               | Surgical complications                         |
| Examining the ability of artificial neural networks machine learning models to accurately predict complications following posterior lumbar spine fusion.   | Kim, J. S.       | 2018 | 29016439                                                                                                                                                                               | Surgical complications                         |
| New phenotypes for sepsis: the promise and problem of applying machine learning and artificial intelligence in clinical research.                          | Knaus, W. A.     | 2019 | 31104067                                                                                                                                                                               | Decompensation                                 |
| Advances in infection surveillance and clinical decision support with fuzzy sets and fuzzy logic.                                                          | Koller, W.       | 2015 | 26262058                                                                                                                                                                               | Healthcare-associated infections               |
| The artificial intelligence clinician learns optimal treatment strategies for sepsis in intensive care.                                                    | Komorowski, M.   | 2018 | 30349085                                                                                                                                                                               | Decompensation                                 |
| Machine learning models to predict disease progression among veterans with hepatitis C virus.                                                              | Konerman, M. A.  | 2019 | 30608929                                                                                                                                                                               | Diagnostic error                               |
| Dynamic Bayesian networks for context-aware fall risk assessment.                                                                                          | Koshmak, G.      | 2014 | 24859032                                                                                                                                                                               | Falls                                          |
| A knowledge engineering framework towards clinical support for adverse drug event prevention: the PSIP approach.                                           | Koutkias, V.     | 2009 | 19745243                                                                                                                                                                               | Adverse drug events                            |
| Constructing clinical decision support systems for adverse drug event prevention: a knowledge-based approach.                                              | Koutkias, V.     | 2010 | 21347009                                                                                                                                                                               | Adverse drug events                            |
| Towards a light-weight query engine for accessing health sensor data in a fall prevention system.                                                          | Kreiner, K.      | 2014 | 25160350                                                                                                                                                                               | Falls                                          |
| Advanced integrated real-time clinical displays.                                                                                                           | Kruger, GH.      | 2011 | 21871406                                                                                                                                                                               | Decompensation                                 |
| Natural language processing to identify foley catheter-days.                                                                                               | Kudesia, V.      | 2012 | 23143371                                                                                                                                                                               | Healthcare-associated infections               |
| Predicting hospital-acquired pneumonia among schizophrenic patients: a machine learning approach.                                                          | Kuo, K. M.       | 2019 | 30866913                                                                                                                                                                               | Healthcare-associated infections               |
| Metabolite profiling of Clostridium difficile ribotypes using small molecular weight volatile organic compounds.                                           | Kuppusami, S.    | 2015 | Kuppusami, S et al. Metabolite profiling of Clostridium difficile ribotypes using small molecular weight volatile organic compounds. <i>Metabolomics</i> . <b>11</b> , 251–260 (2015). | Surgical complications                         |
| Wearable sensors in medical education: supporting hand hygiene training with a forearm EMG.                                                                | Kutafina, E.     | 2015 | 25980884                                                                                                                                                                               | Healthcare-associated infections               |



|                                                                                                                                                                                                     |                    |      |          |                                                                            |
|-----------------------------------------------------------------------------------------------------------------------------------------------------------------------------------------------------|--------------------|------|----------|----------------------------------------------------------------------------|
| Detection of tripping gait patterns in the elderly using autoregressive features and support vector machines.                                                                                       | Lai, D. T. H.      | 2008 | 18433757 | Falls                                                                      |
| On the feasibility of learning to predict minimum toe clearance under different walking speeds.                                                                                                     | Lai, D. T. H.      | 2010 | 21096655 | Falls                                                                      |
| Prediction of foot clearance parameters as a precursor to forecasting the risk of tripping and falling.                                                                                             | Lai, D. T. H.      | 2012 | 21035220 | Falls                                                                      |
| Artificial intelligence techniques for monitoring dangerous infections.                                                                                                                             | Lamma, E.          | 2006 | 16445259 | Healthcare-associated infections                                           |
| Development and validation of a diagnostic model for early differentiation of sepsis and non-infectious SIRS in critically ill children - a data-driven approach using machine-learning algorithms. | Lamping, F.        | 2018 | 29544449 | Decompensation; Diagnostic error                                           |
| Neural network assessment of perioperative cardiac risk in vascular surgery patients.                                                                                                               | Lapuerta, P.       | 1998 | 9456211  | Surgical complications                                                     |
| Detection of correct and incorrect measurements in real-time continuous glucose monitoring systems by applying a postprocessing support vector machine.                                             | Leal, Y.           | 2013 | 23380841 | Decompensation                                                             |
| Development and Validation of a Deep Neural Network Model for Prediction of Postoperative In-hospital Mortality.                                                                                    | Lee, C. K.         | 2018 | 29664888 | Surgical complications                                                     |
| Estimation of body postures on bed using unconstrained ECG measurements.                                                                                                                            | Lee, H. J.         | 2013 | 24240716 | Pressure ulcers                                                            |
| The robot will clean up now. Rival technologies sans data compete for a growing market.                                                                                                             | Lee, J.            | 2015 | 25671888 | Healthcare-associated infections                                           |
| Artificial intelligence versus logistic regression statistical modelling to predict cardiac complications after noncardiac surgery.                                                                 | Lette, J.          | 1994 | 7834935  | Surgical complications                                                     |
| Development and validation of an endoscopic images-based deep learning model for detection with nasopharyngeal malignancies.                                                                        | Li, C.             | 2018 | 30253801 | Diagnostic error                                                           |
| Using nursing information and data mining to explore the factors that predict pressure injuries for patients at the end of life.                                                                    | Li, H. S.          | 2019 | 30418245 | Pressure ulcers                                                            |
| The use of fuzzy backpropagation neural networks for the early diagnosis of hypoxic ischemic encephalopathy in newborns.                                                                            | Li, L.             | 2011 | 21811381 | Diagnostic error                                                           |
| Mining FDA drug labels for medical conditions.                                                                                                                                                      | Li, Q.             | 2013 | 23617267 | Adverse drug events                                                        |
| Machine methods applied to predict ventilator-associated pneumonia with pseudomonas aeruginosa infection via sensor array of electronic nose in intensive care unit.                                | Liao, Y. H.        | 2019 | 31003541 | Healthcare-associated infections                                           |
| Automatic identification of methotrexate-induced liver toxicity in patients with rheumatoid arthritis from the electronic medical record.                                                           | Lin, C.            | 2015 | 25344930 | Adverse drug events                                                        |
| Classification of older adults with/without a fall history using machine learning methods.                                                                                                          | Lin, Z.            | 2015 | 26737845 | Falls                                                                      |
| Deep neural network improves fracture detection by clinicians.                                                                                                                                      | Lindsey, R.        | 2018 | 30348771 | Diagnostic error                                                           |
| Preventable complications and deaths after emergency nontrauma surgery.                                                                                                                             | Linnebur, M.       | 2018 | 30268169 | Surgical complications                                                     |
| Determining molecular predictors of adverse drug reactions with causality analysis based on structure learning.                                                                                     | Liu, M.            | 2014 | 24334612 | Adverse drug events                                                        |
| Machine learning and sepsis: on the road to revolution.                                                                                                                                             | Liu, V. X.         | 2017 | 29028697 | Decompensation                                                             |
| Using machine learning on home health care assessments to predict fall risk                                                                                                                         | Lo, Y.             | 2019 | 31438011 | Falls                                                                      |
| Machine-learned selection of psychological questionnaire items relevant to the development of persistent pain after breast cancer surgery.                                                          | Lotsch, J.         | 2018 | 30336857 | Surgical complications                                                     |
| Machine-learning-derived classifier predicts absence of persistent pain after breast cancer surgery with high accuracy.                                                                             | Lotsch, J.         | 2018 | 29876695 | Surgical complications                                                     |
| Deep learning for fall detection: three-dimensional cnn combined with lstm on video kinematic data.                                                                                                 | Lu, N.             | 2019 | 29994460 | Falls                                                                      |
| Personalized modeling for real-time pressure ulcer prevention in sitting posture.                                                                                                                   | Luboz, V.          | 2018 | 28637592 | Pressure ulcers                                                            |
| An artificial neural network estimation of gait balance control in the elderly using clinical evaluations.                                                                                          | Lugade, V.         | 2014 | 24836062 | Falls                                                                      |
| Presymptomatic prediction of sepsis in intensive care unit patients.                                                                                                                                | Lukaszewski, R. A. | 2008 | 18480235 | Decompensation                                                             |
| Photographic LVAD driveline wound infection recognition using deep learning.                                                                                                                        | Luneburg, N.       | 2019 | 31118337 | Diagnostic error; Healthcare-associated infections; Surgical complications |
| Posture detection based on smart cushion for wheelchair users.                                                                                                                                      | Ma, C.             | 2017 | 28353684 | Pressure ulcers                                                            |
| Depth-based human fall detection via shape features and improved extreme learning machine.                                                                                                          | Ma, X.             | 2014 | 25375688 | Falls                                                                      |
| Reducing false negatives in clinical practice: the role of neural network technology.                                                                                                               | Mango, L. J.       | 1996 | 8885796  | Diagnostic error                                                           |
| Medical decision support using machine learning for early detection of late-onset neonatal sepsis.                                                                                                  | Mani, S.           | 2014 | 24043317 | Decompensation                                                             |
| Multicentre validation of a sepsis prediction algorithm using only vital sign data in the emergency department, general ward and ICU.                                                               | Mao, Q.            | 2018 | 29374661 | Decompensation                                                             |
| Decision support tools, systems, and artificial intelligence in cardiac imaging.                                                                                                                    | Massalha, S.       | 2018 | 29960612 | Diagnostic error                                                           |
| The trail making test: a study of its ability to predict falls in the acute neurological in-patient population.                                                                                     | Mateen, B. A.      | 2018 | 29807453 | Falls                                                                      |
| Flexible, cluster-based analysis of the electronic medical record of sepsis with composite mixture models.                                                                                          | Mayhew, M. B.      | 2018 | 29196114 | Decompensation                                                             |

|                                                                                                                                                                                    |                   |      |                                                                                                                                                                                                                                                                               |                                                          |
|------------------------------------------------------------------------------------------------------------------------------------------------------------------------------------|-------------------|------|-------------------------------------------------------------------------------------------------------------------------------------------------------------------------------------------------------------------------------------------------------------------------------|----------------------------------------------------------|
| Real-time multidimensional temporal analysis of complex high volume physiological data streams in the neonatal intensive care unit.                                                | McGregor, C.      | 2013 | 23920577                                                                                                                                                                                                                                                                      | Decompensation; Diagnostic error                         |
| The use of expert systems for improving test use and enhancing the accuracy of diagnosis.                                                                                          | McNeely, M. D. D. | 2002 | 12134475                                                                                                                                                                                                                                                                      | Diagnostic error                                         |
| Depth-based activity recognition in ICUs using convolutional and recurrent neural networks.                                                                                        | Mehra, R.         | 2017 | Mehra, R., Bianconi, G. M., Yeung, S. & Fei-Fei, L. Depth-based activity recognition in ICUs using convolutional and recurrent neural networks. 1–9 <a href="http://cs231n.stanford.edu/reports/2017/pdfs/506.pdf">http://cs231n.stanford.edu/reports/2017/pdfs/506.pdf</a> . | Decompensation                                           |
| Optimal intensive care outcome prediction over time using machine learning.                                                                                                        | Meiring, C.       | 2018 | 30427913                                                                                                                                                                                                                                                                      | Decompensation                                           |
| Cloud-based smart health monitoring system for automatic cardiovascular and fall risk assessment in hypertensive patients.                                                         | Melillo, P.       | 2015 | 26276015                                                                                                                                                                                                                                                                      | Falls                                                    |
| Machine learning for real-time prediction of complications in critical care: a retrospective study.                                                                                | Meyer, A.         | 2018 | 30274956                                                                                                                                                                                                                                                                      | Decompensation                                           |
| Fall detection using smart floor sensor and supervised learning.                                                                                                                   | Minvielle, L.     | 2017 | 29060638                                                                                                                                                                                                                                                                      | Falls                                                    |
| Development and validation of a predictive model to identify individuals likely to have undiagnosed chronic obstructive pulmonary disease using an administrative claims database. | Moretz, C.        | 2015 | 26679964                                                                                                                                                                                                                                                                      | Diagnostic error                                         |
| Prediction of adverse events in patients undergoing major cardiovascular procedures.                                                                                               | Mortazavi, B. J.  | 2017 | 28287993                                                                                                                                                                                                                                                                      | Healthcare-associated infections; Surgical complications |
| Running on empty? The compensatory reserve index.                                                                                                                                  | Moulton, S. L.    | 2013 | 24256681                                                                                                                                                                                                                                                                      | Decompensation                                           |
| Reconstruction of the genomes of drug-resistant pathogens for outbreak investigation through metagenomic sequencing.                                                               | Mu, A.            | 2019 | 30651402                                                                                                                                                                                                                                                                      | Healthcare-associated infections                         |
| Can we make a carpet smart enough to detect falls?                                                                                                                                 | Muheidat, F.      | 2016 | 28269470                                                                                                                                                                                                                                                                      | Falls                                                    |
| Identifying diagnostic errors with induced decision trees.                                                                                                                         | Murphy, C. K.     | 2001 | 11575486                                                                                                                                                                                                                                                                      | Diagnostic error                                         |
| Machine learning to predict venous thrombosis in acutely ill medical patients.                                                                                                     | Nafee, T.         | 2020 | 32110753                                                                                                                                                                                                                                                                      | Venous thromboembolism                                   |
| Deep learning to predict falls in older adults based on daily-life trunk accelerometry.                                                                                            | Nait, A.          | 2018 | 29786659                                                                                                                                                                                                                                                                      | Falls                                                    |

|                                                                                                                                                                               |                 |      |                                                                                                                                                                                                                                         |                                                    |
|-------------------------------------------------------------------------------------------------------------------------------------------------------------------------------|-----------------|------|-----------------------------------------------------------------------------------------------------------------------------------------------------------------------------------------------------------------------------------------|----------------------------------------------------|
| A deep learning system for automatically identifying critical view of safety in laparoscopic cholecystectomy videos for assessment.                                           | Namazi, B.      | 2017 | Namazi, B., Sankaranarayanan, G., Devarajan, V. & Fleshman, J. A deep learning system for automatically identifying critical view of safety in laparoscopic cholecystectomy videos for assessment. In SAGES 2017 Annual Meeting (2017). | Surgical complications                             |
| A knowledge-based platform for assessing potential adverse drug reactions at the point of care: user requirements and design.                                                 | Natsiavas, P.   | 2019 | 31438076                                                                                                                                                                                                                                | Adverse drug events                                |
| An interpretable machine learning model for accurate prediction of sepsis in the ICU.                                                                                         | Nemati, S.      | 2018 | 29286945                                                                                                                                                                                                                                | Decompensation                                     |
| E-pharmacovigilance: development and implementation of a computable knowledge base to identify adverse drug reactions.                                                        | Neubert, A.     | 2013 | 23586589                                                                                                                                                                                                                                | Adverse drug events                                |
| Effects of plasma transfusion on perioperative bleeding complications: a machine learning approach.                                                                           | Ngufor, C.      | 2015 | 26262146                                                                                                                                                                                                                                | Surgical complications                             |
| A decision support system for pathology test result reviews in an emergency department to support patient safety and increase efficiency.                                     | Nguyen, A.      | 2019 | 31438020                                                                                                                                                                                                                                | Diagnostic error                                   |
| Prediction of postoperative pulmonary complications.                                                                                                                          | Nijbroek, S. G. | 2019 | 30893115                                                                                                                                                                                                                                | Surgical complications                             |
| Towards precision in HF pharmacotherapy.                                                                                                                                      | Norgard, N. B.  | 2017 | 28190189                                                                                                                                                                                                                                | Adverse drug events                                |
| Semiautomated system for nonurgent, clinically significant pathology results.                                                                                                 | O'Connor, S. D. | 2018 | 29874687                                                                                                                                                                                                                                | Diagnostic error                                   |
| Towards a clinical decision support system for drug allergy management: are existing drug reference terminologies sufficient for identifying substitutes and cross-reactants? | Ogallo, W.      | 2015 | 26262387                                                                                                                                                                                                                                | Adverse drug events                                |
| Classification of nervous system withdrawn and approved drugs with ToxPrint features via machine learning strategies.                                                         | Onay, A.        | 2017 | 28325450                                                                                                                                                                                                                                | Adverse drug events                                |
| Addressing the flaws of current critical alarms: a fuzzy constraint satisfaction approach.                                                                                    | Otero, A.       | 2009 | 19796924                                                                                                                                                                                                                                | Diagnostic error                                   |
| Machine learning to predict, detect, and intervene older adults vulnerable for adverse drug events in the emergency department.                                               | Ouchi, K.       | 2018 | 29858745                                                                                                                                                                                                                                | Adverse drug events                                |
| Detecting falls with wearable sensors using machine learning techniques.                                                                                                      | Ozdemir, AT.    | 2014 | 24945676                                                                                                                                                                                                                                | Falls                                              |
| Evaluation of a model for glycemic prediction in critically ill surgical patients.                                                                                            | Pappada, S. M.  | 2013 | 23894489                                                                                                                                                                                                                                | Decompensation                                     |
| Supervised machine learning in critical care: the path forward.                                                                                                               | Parreco, J. P.  | 2018 | 29804636                                                                                                                                                                                                                                | Healthcare-associated infections                   |
| Predicting central line-associated bloodstream infections and mortality using supervised machine learning.                                                                    | Parreco, J. P.  | 2018 | 29486341                                                                                                                                                                                                                                | Healthcare-associated infections                   |
| Neural network analysis of the volumetric capnogram to detect pulmonary embolism.                                                                                             | Patel, M. M.    | 1999 | 10559095                                                                                                                                                                                                                                | Venous thromboembolism                             |
| Application of an artificial intelligence program to therapy of high-risk surgical patients.                                                                                  | Patil, R. S.    | 1996 | 8968986                                                                                                                                                                                                                                 | Surgical complications                             |
| Neural network in the clinical diagnosis of acute pulmonary embolism.                                                                                                         | Patil, S.       | 1993 | 8252942                                                                                                                                                                                                                                 | Diagnostic error; Venous thromboembolism           |
| Prediction of specific pathogens in patients with sepsis: evaluation of TREAT, a computerized decision support system.                                                        | Paul, M.        | 2007 | 17449883                                                                                                                                                                                                                                | Decompensation                                     |
| Artificial neural network-based pharmacogenomic algorithm for warfarin dose optimization.                                                                                     | Pavani, A.      | 2016 | 26666467                                                                                                                                                                                                                                | Adverse drug events                                |
| Developing predictive models using electronic medical records: challenges and pitfalls.                                                                                       | Paxton, C.      | 2013 | 24551396                                                                                                                                                                                                                                | Decompensation                                     |
| Using artificial neural networks to predict potential complications during trauma patients' hospitalization period.                                                           | Pearl, A.       | 2009 | 19745384                                                                                                                                                                                                                                | Decompensation; Healthcare-associated infections   |
| Decision support in trauma management: predicting potential cases of ventilator associated pneumonia.                                                                         | Pearl, A.       | 2012 | 22874201                                                                                                                                                                                                                                | Diagnostic error; Healthcare-associated infections |

|                                                                                                                                                                                                |                        |      |          |                                                          |
|------------------------------------------------------------------------------------------------------------------------------------------------------------------------------------------------|------------------------|------|----------|----------------------------------------------------------|
| Vision-based absence seizure detection.                                                                                                                                                        | Pediaditis, M.         | 2012 | 23365833 | Diagnostic error                                         |
| Predicting postoperative nausea and vomiting with the application of an artificial neural network.                                                                                             | Peng, S. Y.            | 2007 | 17065170 | Surgical complications                                   |
| A review of recent advances in data analytics for post-operative patient deterioration detection.                                                                                              | Petit, C.              | 2018 | 28828569 | Decompensation; Surgical complications                   |
| Predictors of post-operative cardiovascular events, focused on atrial fibrillation, after valve surgery for primary mitral regurgitation.                                                      | Pimor, A.              | 2019 | 29608669 | Surgical complications                                   |
| Context-sensitive autoassociative memories as expert systems in medical diagnosis.                                                                                                             | Pomi, A.               | 2006 | 17121675 | Decompensation; Diagnostic error                         |
| An event-triggered machine learning approach for accelerometer-based fall detection.                                                                                                           | Putra, I. P. E. S.     | 2017 | 29271895 | Falls                                                    |
| Adverse drug event monitoring with clinical and laboratory data using arden syntax.                                                                                                            | Rappelsberger, A.      | 2017 | 29295277 | Adverse drug events                                      |
| Elderly fall risk prediction based on a physiological profile approach using artificial neural networks.                                                                                       | Razmara, J.            | 2018 | 28050920 | Falls                                                    |
| Simplified risk score models accurately predict the risk of major in-hospital complications following percutaneous coronary intervention.                                                      | Resnic, F. S.          | 2001 | 11423050 | Surgical complications                                   |
| Sepsis mortality prediction with the quotient basis kernel.                                                                                                                                    | Ribas, R.              | 2014 | 24726036 | Decompensation                                           |
| Severe sepsis mortality prediction with relevance vector machines.                                                                                                                             | Ribas, V. J.           | 2011 | 22254260 | Decompensation                                           |
| Computerized detection of nosocomial infections in newborns.                                                                                                                                   | Rocha, B. H.           | 1994 | 7950013  | Healthcare-associated infections                         |
| Personalized and automated remote monitoring of atrial fibrillation.                                                                                                                           | Rosier, A.             | 2016 | 26487670 | Decompensation                                           |
| Neural hypernetwork approach for pulmonary embolism diagnosis.                                                                                                                                 | Rucco, M.              | 2015 | 26515513 | Venous thromboembolism                                   |
| Palivizumab prophylaxis during nosocomial outbreaks of respiratory syncytial virus in a neonatal intensive care unit: predicting effectiveness with an artificial neural network model.        | Saadah, L. M.          | 2014 | 23897635 | Healthcare-associated infections                         |
| Evaluation of comfort associated with the use of a robotic mattress with an interface pressure mapping system and automatic inner air-cell pressure adjustment function in healthy volunteers. | Saegusa, M.            | 2018 | 29910093 | Pressure ulcers                                          |
| Development of an early diagnostic system using fuzzy theory for postoperative infections in patients with gastric cancer.                                                                     | Sakaguchi, S.          | 2004 | 15237253 | Healthcare-associated infections; Surgical complications |
| Validation of an online risk calculator for the prediction of anastomotic leak after colon cancer surgery and preliminary exploration of artificial intelligence-based analytics.              | Sammour, T.            | 2017 | 29080956 | Surgical complications                                   |
| Comparison of variable selection methods for clinical predictive modeling.                                                                                                                     | Sanchez-Pinto, L. N.   | 2018 | 29887230 | Decompensation                                           |
| A prognostic model of surgical site infection using daily clinical wound assessment.                                                                                                           | Sanger, P. C.          | 2016 | 27188832 | Surgical complications                                   |
| Computing network-based features from physiological time series: application to sepsis detection.                                                                                              | Santaniello, S.        | 2014 | 25570825 | Decompensation                                           |
| A machine learning approach to estimate minimum toe clearance using inertial measurement units                                                                                                 | Santhiranayagam, B. K. | 2015 | 26573902 | Falls                                                    |
| Prediction of postoperative morbidity after lung resection using an artificial neural network ensemble.                                                                                        | Santos-Garcia, G.      | 2004 | 14684265 | Surgical complications                                   |
| Individualized sepsis treatment using reinforcement learning.                                                                                                                                  | Saria, S.              | 2018 | 30397359 | Decompensation                                           |
| Electronic nose in the detection of wound infection bacteria from bacterial cultures: a proof-of-principle study.                                                                              | Saviauk, T.            | 2018 | 29320769 | Surgical complications                                   |
| Computer-assisted decision support for the diagnosis and treatment of infectious diseases in intensive care units.                                                                             | Schurink, C. A. M.     | 2005 | 15854886 | Healthcare-associated infections                         |
| The promise and perils of wearable physiological sensors for diabetes management.                                                                                                              | Schwartz, F.           | 2018 | 29542348 | Decompensation                                           |
| Classification of patients with sepsis according to blood genomic endotype: a prospective cohort study.                                                                                        | Scicluna, B. P.        | 2017 | 28864056 | Decompensation                                           |
| Machine learning for predicting sepsis in-hospital mortality: an important start.                                                                                                              | Scott, H.              | 2016 | 27163688 | Decompensation                                           |
| Neural network analysis of ventilation-perfusion lung scans.                                                                                                                                   | Scott, J. A.           | 1993 | 8430170  | Venous thromboembolism                                   |
| Using artificial neural network analysis of global ventilation-perfusion scan morphometry as a diagnostic tool.                                                                                | Scott, J. A.           | 1999 | 10511154 | Diagnostic error; Venous thromboembolism                 |
| How well can radiologists using neural network software diagnose pulmonary embolism?.                                                                                                          | Scott, J. A.           | 2000 | 10915682 | Diagnostic error; Venous thromboembolism                 |
| Pulmonary perfusion patterns and pulmonary arterial pressure.                                                                                                                                  | Scott, J. A.           | 2002 | 12147850 | Diagnostic error; Venous thromboembolism                 |

|                                                                                                                                                                                                                                                                  |                    |      |                                                                                                                                                       |                                                          |
|------------------------------------------------------------------------------------------------------------------------------------------------------------------------------------------------------------------------------------------------------------------|--------------------|------|-------------------------------------------------------------------------------------------------------------------------------------------------------|----------------------------------------------------------|
| Artificial intelligence: its use in medical diagnosis.                                                                                                                                                                                                           | Scott, R.          | 1993 | 8441047                                                                                                                                               | Diagnostic error; Venous thromboembolism                 |
| Adopting a smart toothbrush with artificial intelligence may improve oral care in patients admitted to the intensive care unit.                                                                                                                                  | Scquizzato, T.     | 2019 | 31215441                                                                                                                                              | Healthcare-associated infections                         |
| How doctors think, and how software can help avoid cognitive errors in diagnosis.                                                                                                                                                                                | Segal, M.          | 2007 | 17850393                                                                                                                                              | Diagnostic error                                         |
| Automated lung outline reconstruction in ventilation-perfusion scans using principal component analysis techniques.                                                                                                                                              | Serpen, G.         | 2003 | 12565727                                                                                                                                              | Venous thromboembolism                                   |
| A knowledge-based artificial neural network classifier for pulmonary embolism diagnosis.                                                                                                                                                                         | Serpen, G.         | 2008 | 18022148                                                                                                                                              | Venous thromboembolism                                   |
| Fuzzy logic in neurosurgery: predicting poor outcomes after lumbar disk surgery in 501 consecutive patients.                                                                                                                                                     | Shamim, M. S.      | 2009 | 20082825                                                                                                                                              | Surgical complications                                   |
| Java-based diabetes type 2 prediction tool for better diagnosis.                                                                                                                                                                                                 | Shankaracharya, O. | 2012 | 22059431                                                                                                                                              | Diagnostic error                                         |
| Artificial neural networking model for the prediction of early occlusion of bilateral plastic stent placement for inoperable hilar cholangiocarcinoma.                                                                                                           | Shao, F.           | 2018 | 29252936                                                                                                                                              | Surgical complications                                   |
| An integrated framework for identification of effective and synergistic anti-cancer drug combinations.                                                                                                                                                           | Sharma, A.         | 2018 | 30304987                                                                                                                                              | Adverse drug events                                      |
| Aiding the digital mammogram for detecting the breast cancer using shearlet transform and neural network.                                                                                                                                                        | Shenbagavalli, P.  | 2018 | 30256567                                                                                                                                              | Diagnostic error                                         |
| Hemodynamic and oxygen transport patterns for outcome prediction, therapeutic goals, and clinical algorithms to improve outcome. Feasibility of artificial intelligence to customize algorithms.                                                                 | Shoemaker, W. C.   | 1992 | 1424937                                                                                                                                               | Surgical complications                                   |
| Prediction of allogeneic hematopoietic stem-cell transplantation mortality 100 days after transplantation using a machine learning algorithm: a european group for blood and marrow transplantation acute leukemia working party retrospective data mining study | Shouval, R.        | 2015 | 26240227                                                                                                                                              | Surgical complications                                   |
| Time-domain heart rate variability-based computer-aided prognosis of lung cancer.                                                                                                                                                                                | Shukla, R. S.      | 2018 | 30147095                                                                                                                                              | Diagnostic error                                         |
| Emerging technologies for molecular diagnosis of sepsis.                                                                                                                                                                                                         | Sinha, M.          | 2018 | 29490932                                                                                                                                              | Decompensation                                           |
| Predicting neurosurgical outcomes in focal epilepsy patients using computational modelling.                                                                                                                                                                      | Sinha, N.          | 2017 | 28011454                                                                                                                                              | Surgical complications                                   |
| Automated surveillance of healthcare-associated infections: state of the art.                                                                                                                                                                                    | Sips, M. E.        | 2017 | 28505027                                                                                                                                              | Healthcare-associated infections                         |
| Computer-aided, case-based diagnosis of mammographic regions of interest containing microcalcifications.                                                                                                                                                         | Sklansky, J.       | 2000 | 10845398                                                                                                                                              | Diagnostic error                                         |
| Evaluation of a novel system to enhance clinicians' recognition of preadmission adverse drug reactions.                                                                                                                                                          | Smith, J. C.       | 2018 | 29742757                                                                                                                                              | Adverse drug events                                      |
| Data-driven temporal prediction of surgical site infection.                                                                                                                                                                                                      | Soguero-Ruiz, C.   | 2015 | 26958256                                                                                                                                              | Surgical complications                                   |
| Support vector feature selection for early detection of anastomosis leakage from bag-of-words in electronic health records.                                                                                                                                      | Soguero-Ruiz, C.   | 2016 | 25312965                                                                                                                                              | Surgical complications                                   |
| Predicting colorectal surgical complications using heterogeneous clinical data and kernel methods.                                                                                                                                                               | Soguero-Ruiz, C.   | 2016 | 26980235                                                                                                                                              | Surgical complications                                   |
| Detection of clinically important colorectal surgical site infection using Bayesian network.                                                                                                                                                                     | Sohn, S.           | 2017 | 28032554                                                                                                                                              | Healthcare-associated infections; Surgical complications |
| Predicting developmental disorder in infants using an artificial neural network.                                                                                                                                                                                 | Soleimani, F.      | 2013 | 23852837                                                                                                                                              | Diagnostic error                                         |
| Reducing the toxicity risk in antibiotic prescriptions by combining Oontologies with a multiple criteria decision model.                                                                                                                                         | Souissi, S. B.     | 2017 | 29854233                                                                                                                                              | Adverse drug events                                      |
| Feasibility of applying data mining techniques for predicting technical difficulties during laparoscopic cholecystectomy based on routine patient work-up in a small community hospital.                                                                         | Stanisic, V.       | 2013 | 24052489                                                                                                                                              | Surgical complications                                   |
| Compensatory reserve for early and accurate prediction of hemodynamic compromise: case studies for clinical utility in acute care and physical performance.                                                                                                      | Stewart, C.        | 2016 | 27045488                                                                                                                                              | Decompensation                                           |
| Data mining techniques for assisting the diagnosis of pressure ulcer development in surgical patients.                                                                                                                                                           | Su, C. T.          | 2012 | 21503743                                                                                                                                              | Pressure ulcers                                          |
| Clinical intervention prediction and understanding with deep neural networks.                                                                                                                                                                                    | Suresh, H.         | 2017 | Suresh, H. et al. Clinical intervention prediction and understanding using deep networks. <i>Mach. Learn. Healthc. Conf.</i> <b>68</b> , 1–16 (2017). | Decompensation                                           |

|                                                                                                                                                                |                       |      |          |                                                          |
|----------------------------------------------------------------------------------------------------------------------------------------------------------------|-----------------------|------|----------|----------------------------------------------------------|
| Development and validation of a novel molecular biomarker diagnostic test for the early detection of sepsis.                                                   | Sutherland, A.        | 2011 | 21682927 | Decompensation                                           |
| Artificial neural networks in nuclear medicine.                                                                                                                | Swietlik, D.          | 2004 | 15318313 | Diagnostic error                                         |
| A self-administered screening instrument for psychogenic nonepileptic seizures.                                                                                | Syed, T. U.           | 2009 | 19433737 | Diagnostic error                                         |
| Comparison of 2 natural language processing methods for identification of bleeding among critically ill patients.                                              | Taggart, M.           | 2018 | 30646240 | Decompensation                                           |
| Autoregressive-moving-average hidden Markov model for vision-based fall prediction-An application for walker robot.                                            | Taghvaei, S.          | 2017 | 27450279 | Falls                                                    |
| Improving end of life care: an information systems approach to reducing medical errors.                                                                        | Tamang, S.            | 2005 | 15923765 | Diagnostic error                                         |
| Combining biomarkers with EMR data to identify patients in different phases of sepsis.                                                                         | Taneja, I.            | 2017 | 28883645 | Decompensation                                           |
| Prediction of in-hospital mortality in emergency department patients with sepsis: a local big data-driven, machine learning approach.                          | Taylor, R. A.         | 2016 | 26679719 | Decompensation                                           |
| Predicting urinary tract infections in the emergency department with machine learning.                                                                         | Taylor, R. A.         | 2018 | 29513742 | Diagnostic error                                         |
| Application of machine learning techniques to high-dimensional clinical data to forecast postoperative complications.                                          | Thottakkara, P.       | 2016 | 27232332 | Decompensation; Surgical complications                   |
| Automated extraction of vte events from narrative radiology reports in electronic health records: a validation study.                                          | Tian, Z.              | 2017 | 25924079 | Venous thromboembolism                                   |
| Use of machine learning theory to predict the need for femoral nerve block following ACL repair.                                                               | Tighe, P.             | 2011 | 21899717 | Surgical complications                                   |
| Use of machine-learning classifiers to predict requests for preoperative acute pain service consultation.                                                      | Tighe, P.             | 2012 | 22958457 | Surgical complications                                   |
| Teaching a machine to feel postoperative pain: combining high-dimensional clinical data with machine learning algorithms to forecast acute postoperative pain. | Tighe, P. J.          | 2015 | 26031220 | Surgical complications                                   |
| Detection of lung cancer in exhaled breath with an electronic nose using support vector machine analysis.                                                      | Tirzite, M.           | 2017 | 28585921 | Diagnostic error                                         |
| Predictive analytics for identification of patients at risk for QT interval prolongation: a systematic review.                                                 | Tomaselli, M.         | 2018 | 29882591 | Decompensation                                           |
| Acute pulmonary embolism: artificial neural network approach for diagnosis.                                                                                    | Tourassi, G. D.       | 1993 | 8210389  | Venous thromboembolism                                   |
| The effect of data sampling on the performance evaluation of artificial neural networks in medical diagnosis.                                                  | Tourassi, G. D.       | 1997 | 9107614  | Diagnostic error; Venous thromboembolism                 |
| Acute pulmonary embolism: cost-effectiveness analysis of the effect of artificial neural networks on patient care.                                             | Tourassi, G. D.       | 1998 | 9423655  | Venous thromboembolism                                   |
| Multifractal texture analysis of perfusion lung scans as a potential diagnostic tool for acute pulmonary embolism.                                             | Tourassi, G. D.       | 2001 | 11058691 | Diagnostic error; Venous thromboembolism                 |
| Eigen posture based fall risk assessment system using kinect.                                                                                                  | Tripathy, SR.         | 2018 | 30440310 | Falls                                                    |
| Adverse outcome in surgery for chronic leg ischaemia--risk factors and risk prediction when using different statistical methods.                               | Troeng, T.            | 1992 | 1451819  | Surgical complications                                   |
| Morphological and wavelet features towards sonographic thyroid nodules evaluation.                                                                             | Tsantis, S.           | 2009 | 19111442 | Diagnostic error                                         |
| On the wearable sensor data fusion to a single sensor machine learning technique in fall detection.                                                            | Tsinganos, P.         | 2018 | 29443923 | Falls                                                    |
| Machine learning classification of medication adherence in patients with movement disorders using non-wearable sensors.                                        | Tucker, C.            | 2015 | 26406881 | Adverse drug events                                      |
| Learning approaches to improve prediction of drug sensitivity in breast cancer patients.                                                                       | Turki, T.             | 2016 | 28269014 | Adverse drug events                                      |
| Abciximab pharmacodynamic model with neural networks used to integrate sources of patient variability.                                                         | Urquidi-Macdonald, M. | 2004 | 14749692 | Adverse drug events                                      |
| A minimal set of physiomarkers in continuous high frequency data streams predict adult sepsis onset earlier.                                                   | van Wyk, F.           | 2019 | 30623784 | Decompensation                                           |
| Quantifying surgical complexity with machine learning: looking beyond patient factors to improve surgical models.                                              | Van, E.               | 2014 | 25108343 | Healthcare-associated infections; Surgical complications |
| Relevance of deep learning to facilitate the diagnosis of HER2 status in breast cancer.                                                                        | Vandenberghe, M. E.   | 2017 | 28378829 | Diagnostic error                                         |
| A framework for patient state tracking by classifying multiscalar physiologic waveform features.                                                               | Vandendriessche, B.   | 2017 | 28328498 | Decompensation                                           |
| Machine learning in critical care: state-of-the-art and a sepsis case study.                                                                                   | Vellido, A.           | 2018 | 30458795 | Decompensation                                           |
| Improved diagnosis of breast implant rupture with sonographic findings and artificial neural networks.                                                         | Venta, L. A.          | 1998 | 9561256  | Diagnostic error                                         |
| Prognostic Bayesian networks II: an application in the domain of cardiac surgery.                                                                              | Verduijn, M.          | 2007 | 17709302 | Surgical complications                                   |
| Binary tissue classification on wound images with neural networks and bayesian classifiers.                                                                    | Veredas, F.           | 2010 | 19825516 | Pressure ulcers                                          |
| Processing gradual information with fuzzy arden syntax.                                                                                                        | Vetterlein, T.        | 2010 | 20841802 | Healthcare-associated infections                         |
| Identifying predictive features in drug response using machine learning: opportunities and challenges.                                                         | Vidyasagar, M.        | 2015 | 25423479 | Adverse drug events                                      |
| Predicting macular edema recurrence from spatio-temporal signatures in optical coherence tomography images.                                                    | Vogl, W. D.           | 2017 | 28475051 | Diagnostic error                                         |

|                                                                                                                                                                                                                                          |                   |      |                                                                                                                                                                                                                                       |                                                                    |
|------------------------------------------------------------------------------------------------------------------------------------------------------------------------------------------------------------------------------------------|-------------------|------|---------------------------------------------------------------------------------------------------------------------------------------------------------------------------------------------------------------------------------------|--------------------------------------------------------------------|
| Predicting nocturnal hypoglycemia from continuous glucose monitoring data with extended prediction horizon.                                                                                                                              | Vu, L.            | 2019 | 32308884                                                                                                                                                                                                                              | Adverse drug events                                                |
| Prediction of severe sepsis using SVM model.                                                                                                                                                                                             | Wang, S. L.       | 2010 | 20865488                                                                                                                                                                                                                              | Decompensation                                                     |
| Automatic learning of mortality in a CPN model of the systemic inflammatory response syndrome.                                                                                                                                           | Ward, L.          | 2017 | 27833000                                                                                                                                                                                                                              | Decompensation                                                     |
| Classification of hospital acquired complications using temporal clinical information from a large electronic health record.                                                                                                             | Warner, J. L.     | 2016 | 26707449                                                                                                                                                                                                                              | Surgical complications                                             |
| Usefulness of a computerized expert system associated with systematic O-serotyping for the early detection of outbreaks of hospital acquired infections and for the presumptive antibiotic therapy of Pseudomonas aeruginosa infections. | Watine, J.        | 1996 | 8761597                                                                                                                                                                                                                               | Healthcare-associated infections                                   |
| Improving diagnostic accuracy using a hierarchical neural network to model decision subtasks.                                                                                                                                            | West, D.          | 2000 | 10708254                                                                                                                                                                                                                              | Diagnostic error                                                   |
| Intelligent alarms reduce anesthesiologist's response time to critical faults.                                                                                                                                                           | Westenskow, D. R. | 1992 | 1466459                                                                                                                                                                                                                               | Diagnostic error                                                   |
| Artificial intelligence: an inkling of caution.                                                                                                                                                                                          | Wetzel, R. C.     | 2018 | 30281572                                                                                                                                                                                                                              | Decompensation                                                     |
| A web-based system for clinical decision support and knowledge maintenance for deterioration monitoring of hemato-oncological patients.                                                                                                  | Wicht, A.         | 2013 | 23522434                                                                                                                                                                                                                              | Decompensation; Diagnostic error; Healthcare-associated infections |
| The use of artificial neural network analysis can improve the risk-stratification of patients presenting with suspected deep vein thrombosis.                                                                                            | Willan, J.        | 2019 | Willan, J., Katz, H. & Keeling, D. The use of artificial neural network analysis can improve the risk-stratification of patients presenting with suspected deep vein thrombosis. <i>Br. J. Haematol.</i> <b>185</b> , 289–296 (2019). | Venous thromboembolism                                             |
| Prediction of prolonged ventilation after coronary artery bypass grafting: data from an artificial neural network.                                                                                                                       | Wise, E. S.       | 2017 | 28263144                                                                                                                                                                                                                              | Surgical complications                                             |
| Computer-assisted detection of pulmonary embolism: evaluation of pulmonary CT angiograms performed in an on-call setting.                                                                                                                | Wittenberg, R.    | 2010 | 19862534                                                                                                                                                                                                                              | Venous thromboembolism                                             |
| Natural language processing and its implications for the future of medication safety: a narrative review of recent advances and challenges.                                                                                              | Wong, A.          | 2018 | 29884988                                                                                                                                                                                                                              | Adverse drug events                                                |
| Predicting postoperative vomiting among orthopedic patients receiving patient-controlled epidural analgesia using SVM and LR.                                                                                                            | Wu, H. Y.         | 2016 | 27247165                                                                                                                                                                                                                              | Surgical complications                                             |
| Combining support vector machine with genetic algorithm to classify ultrasound breast tumor images.                                                                                                                                      | Wu, W. J.         | 2012 | 22939834                                                                                                                                                                                                                              | Diagnostic error                                                   |
| Adverse drug event detection from electronic health records using hierarchical recurrent neural networks with dual-level embedding.                                                                                                      | Wunnava, S.       | 2019 | 30649736                                                                                                                                                                                                                              | Adverse drug events                                                |
| Evaluation of feature extraction and recognition for activity monitoring and fall detection based on wearable EMG sensors.                                                                                                               | Xi, X.            | 2017 | 28555016                                                                                                                                                                                                                              | Falls                                                              |
| DINIES: drug-target interaction network inference engine based on supervised analysis.                                                                                                                                                   | Yamanishi, Y.     | 2014 | 24838565                                                                                                                                                                                                                              | Adverse drug events                                                |
| Use of an artificial neural network to differentiate between ECGs with IRBBB patterns of atrial septal defect and healthy subjects.                                                                                                      | Yang, S.          | 2002 | 12509123                                                                                                                                                                                                                              | Diagnostic error                                                   |
| Leveraging reporting through knowledge support: a knowledge-based approach to promoting patient fall prevention.                                                                                                                         | Yao, B.           | 2017 | 29295245                                                                                                                                                                                                                              | Falls                                                              |
| Bedside computer vision - moving artificial intelligence from driver assistance to patient safety.                                                                                                                                       | Yeung, S.         | 2018 | 29617592                                                                                                                                                                                                                              | Falls; Healthcare-associated infections; Surgical complications    |
| Establishing a classification system for high fall-risk among inpatients using support vector machines.                                                                                                                                  | Yokota, S.        | 2017 | 28800580                                                                                                                                                                                                                              | Falls                                                              |
| Jump neural network for real-time prediction of glucose concentration.                                                                                                                                                                   | Zecchin, C.       | 2015 | 25502386                                                                                                                                                                                                                              | Decompensation                                                     |
| Developing and evaluating a machine learning based algorithm to predict the need of pediatric intensive care unit transfer for newly hospitalized children.                                                                              | Zhai, H.          | 2014 | 24813568                                                                                                                                                                                                                              | Decompensation                                                     |
| Gastric precancerous diseases classification using CNN with a concise model.                                                                                                                                                             | Zhang, X.         | 2017 | 28950010                                                                                                                                                                                                                              | Diagnostic error                                                   |
| Classification of whole mammogram and tomosynthesis images using deep convolutional neural networks.                                                                                                                                     | Zhang, X.         | 2018 | 29994219                                                                                                                                                                                                                              | Diagnostic error                                                   |

|                                                                                                                                                                              |             |      |          |                        |
|------------------------------------------------------------------------------------------------------------------------------------------------------------------------------|-------------|------|----------|------------------------|
| A single kernel-based approach to extract drug-drug interactions from biomedical literature.                                                                                 | Zhang, Y.   | 2012 | 23133662 | Adverse drug events    |
| Handling temporality of clinical events for drug safety surveillance.                                                                                                        | Zhao, J.    | 2015 | 26958278 | Adverse drug events    |
| A graph kernel based on context vectors for extracting drug-drug interactions.                                                                                               | Zheng, W.   | 2016 | 27012903 | Adverse drug events    |
| An attention-based effective neural model for drug-drug interactions extraction.                                                                                             | Zheng, W.   | 2017 | 29017459 | Adverse drug events    |
| Predicting adverse drug reactions of combined medication from heterogeneous pharmacologic databases.                                                                         | Zheng, Y.   | 2018 | 30598065 | Adverse drug events    |
| Classification analyses for prostate cancer, benign prostate hyperplasia and healthy subjects by SERS-based immunoassay of multiple tumour markers.                          | Zhou, L.    | 2018 | 30029370 | Diagnostic error       |
| Use of artificial neural network to predict warfarin individualized dosage regime in Chinese patients receiving low-intensity anticoagulation after heart valve replacement. | Zhou, Q.    | 2014 | 25164187 | Surgical complications |
| Lung cancer cell identification based on artificial neural network ensembles.                                                                                                | Zhou, Z. H. | 2002 | 11779683 | Diagnostic error       |
| Modeling polypharmacy side effects with graph convolutional networks.                                                                                                        | Zitnik, M.  | 2018 | 29949996 | Adverse drug events    |
